# Supplementary material for: florio® HAEMO: A Longitudinal Survey of Patient Preference, Adherence and Wearable Functionality in Central Europe
Source: Springer Nature journal article supplement (doi:10.1007/s12325-024-02872-3), 2024-05-16

## SUPPLEMENTARY MATERIAL

### **florio® HAEMO: a longitudinal survey of patient preference, adherence and wearable functionality in Central Europe**

Ester Zapotocka<sup>1,2\*</sup>, Angelika Batorova<sup>3</sup>, Ernest Bilic<sup>4</sup>, Ana Boban<sup>5,6</sup>, Carmen Escuriola Ettingshausen<sup>7</sup>, Barbara Faganel Kotnik<sup>8</sup>, Radomira Hrdlickova<sup>9</sup>, Pawel Laguna<sup>10</sup>, Jan Máchal<sup>11,12</sup>, Laszlo Nemes<sup>13</sup>, Irena Preloznik Zupan<sup>14</sup>, Gediminas Puras<sup>15</sup>, Marianna Zombori<sup>16</sup>.

1. Department of Pediatric Hematology/Oncology, University Hospital Motol, Prague, Czech Republic
2. Secondary Faculty of Medicine, Charles University, Prague, Czech Republic
3. National Hemophilia Center, Department of Hematology and Transfusion Medicine, Faculty of Medicine of Comenius University and University Hospital, Bratislava, Slovakia;
4. Department of Pediatrics, Division of Hematology and Oncology, University Hospital Center Zagreb, Zagreb, Croatia
5. Division of Hematology, Department of Internal Medicine, University Hospital Center Zagreb, University of Zagreb, Zagreb, Croatia
6. School of Medicine, Zagreb, Croatia
7. HZRM Hamophilie Zentrum Rhein Main, Mörfelden-Walldorf, Germany
8. Department of Hematology and Oncology, University Children's Hospital, University Medical Center Ljubljana, Ljubljana, Slovenia
9. Blood Center, University Hospital Ostrava, Ostrava, Czech Republic
10. Department of Pediatric, Oncology, Hematology and Transplantology, Warsaw Medical University, Warsaw, Poland
11. Department of Pediatric Hematology and Biochemistry, Masaryk University, Brno, Czech Republic

12. Department of Pediatric Hematology and Biochemistry, University Hospital Brno, Brno, Czech Republic.
13. National Hemophilia Centre and Haemostasis Department, Central Hospital of Northern Pest – Military Hospital, Budapest, Hungary
14. Department of Hematology, University Medical Center Ljubljana, Faculty of Medicine, University of Ljubljana, Ljubljana, Slovenia
15. Swedish Orphan Biovitrum AG, Basel, Switzerland
16. Department of Onco-Hematology, Heim Pál Nationale Institute of Pediatrics, Budapest, Hungary

**\*Corresponding author:** Dr. Ester Zapotocka

Email: [ester.zapotocka@fnmotol.cz](mailto:ester.zapotocka@fnmotol.cz)

**Figure S1. Data entry during the past two weeks using florio® HAEMO**

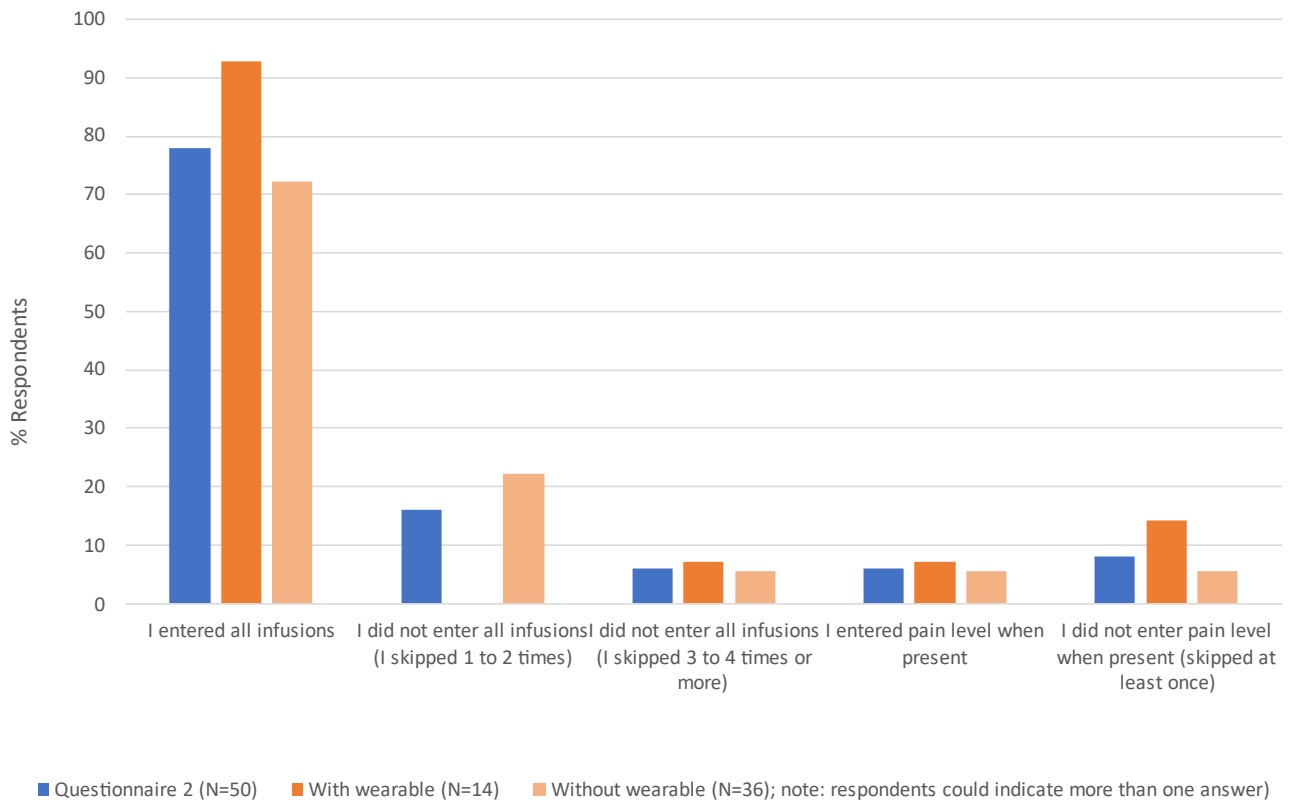

**Figure S2. Ease of use of the florio® HAEMO app**

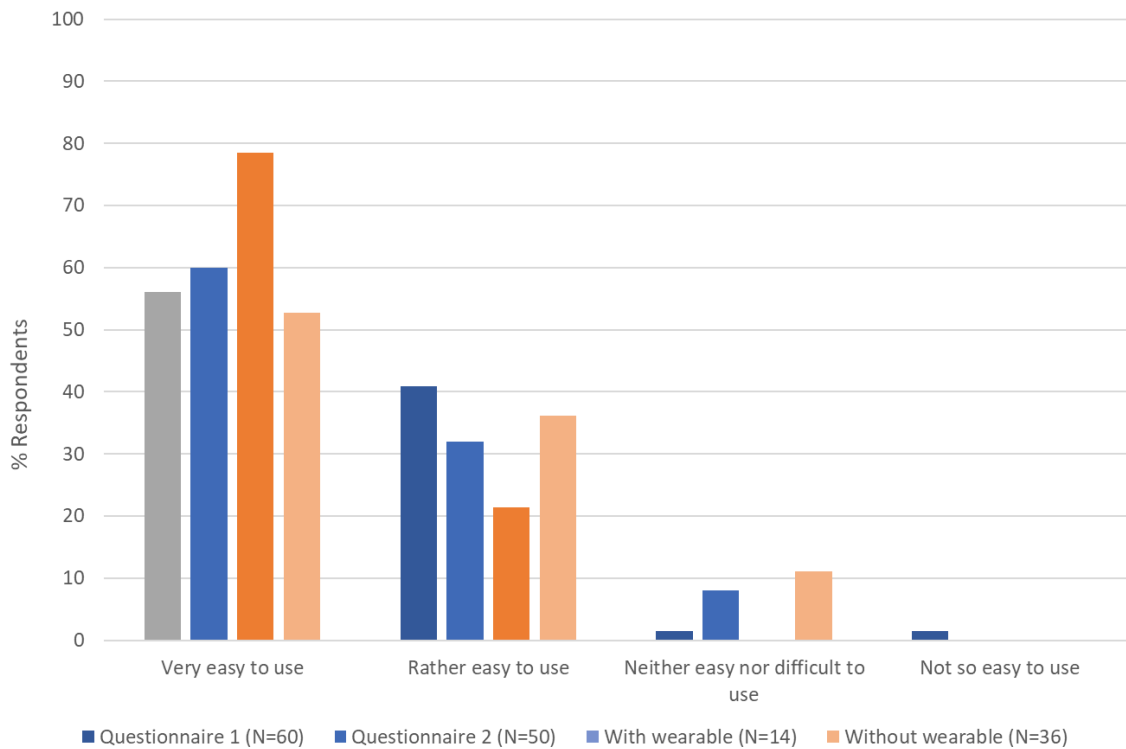

Supplement: MOESM1 [file 27099142]
